# Supplementary material for: A solventless thermolysis route to large-scale production of ultra-small hydrophilic and biocompatible magnetic ferrite nanocrystals and their application for efficient protein enrichment
Source: Royal Society of Chemistry journal article supplement (doi:10.1039/c3gc42645a), 2014-01-01
Supplement: c3gc42645a1.pdf [file c3gc42645a1.pdf]

## Supporting Information

### A Solventless Thermolysis Route to Large-Scale Production of Ultra-Small Hydrophilic and Biocompatible Magnetic Ferrite Nanocrystals and Their Application for Efficient Protein Enrichment

*Chun Xian Guo, Sihua Huang and Xianmao Lu\**

Prof. X. M. Lu, Dr. C. X. Guo

Department of Chemical & Biomolecular Engineering

National University of Singapore, Singapore 117585

E-mail: [chelxm@nus.edu.sg](mailto:chelxm@nus.edu.sg)

S. H. Huang

Biosystems & Micromechanics Interdisciplinary Research Group (BioSyM), Singapore-MIT Alliance in Research & Technology (SMART), Singapore

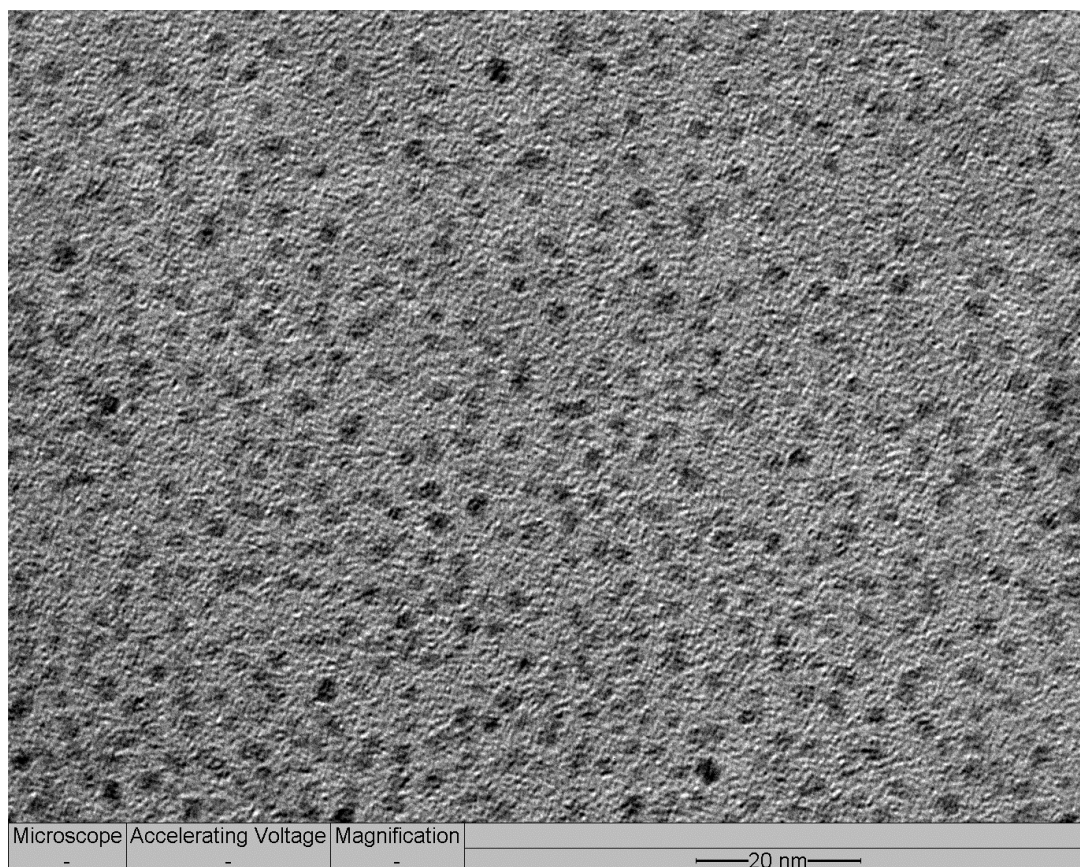

**Fig. S1** Low magnification TEM image of MNPs\_SC10, showing the relative uniform distribution of the ultra-small nanoparticles.

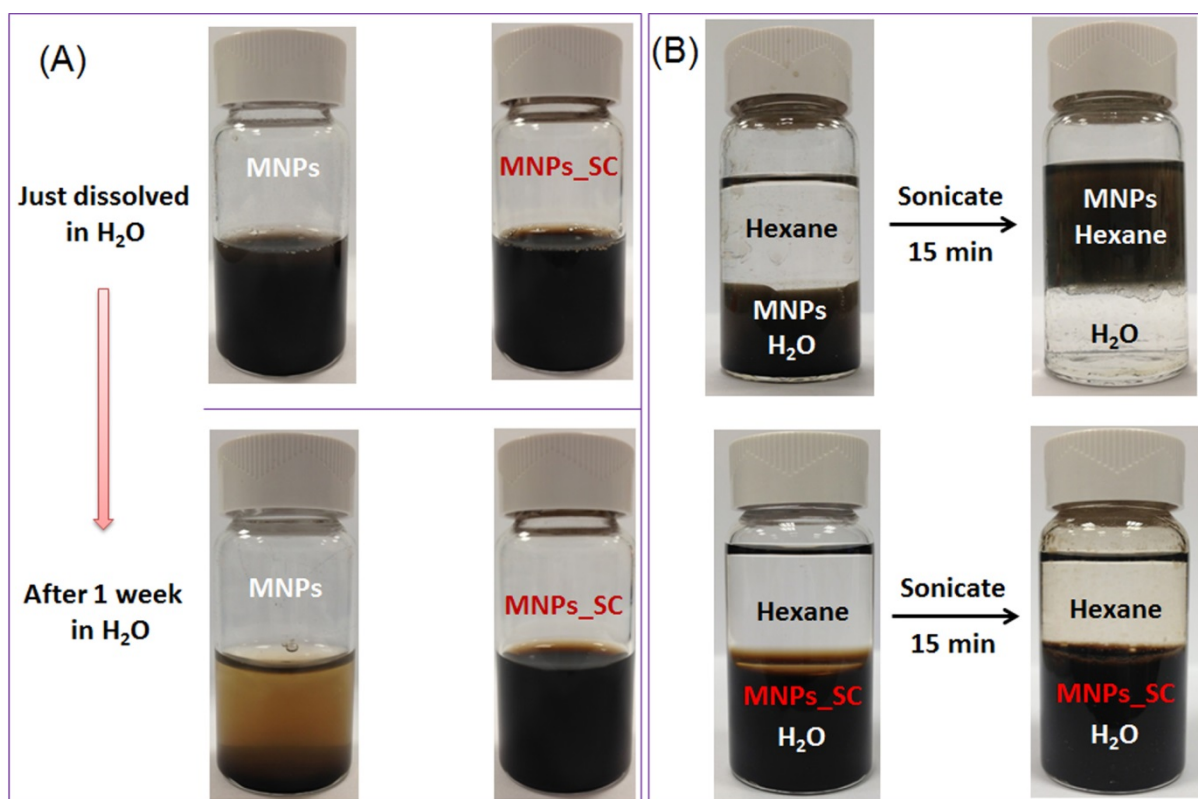

**Fig. S2** (A) Hydrophilicity related aqueous dispersion of MNPs and MNPs<sub>SC</sub>. (B) MNPs and MNPs<sub>SC</sub> in a water/hexane system. After sonication, MNPs readily migrated into the hexane layer but MNPs<sub>SC</sub> retained in the water layer.

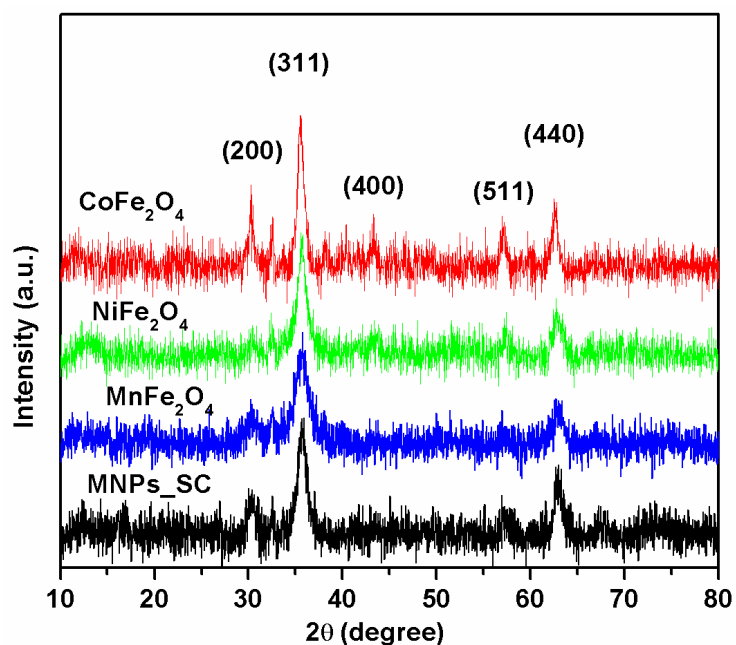

**Fig. S3** Powder XRD patterns of the MNPs<sub>SC</sub> and mixed metal ferrite nanoparticles of MnFe<sub>2</sub>O<sub>4</sub>, NiFe<sub>2</sub>O<sub>4</sub>, and CoFe<sub>2</sub>O<sub>4</sub>.

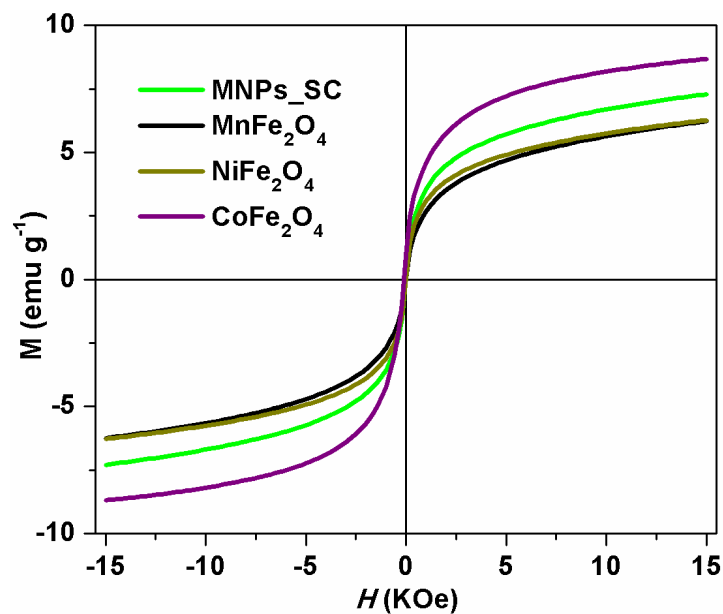

**Fig. S4** Magnetic behaviors of MNP<sub>s</sub>\_SC and metal ferrite nanoparticles of MnFe<sub>2</sub>O<sub>4</sub>, NiFe<sub>2</sub>O<sub>4</sub> and CoFe<sub>2</sub>O<sub>4</sub>. The curves were measured using a vibrating sample magnetometer at 298 K. All  $M$  values were obtained by dividing the electromagnetic unit (emu) values by the total weight of nanoparticles (including the core and ligands).

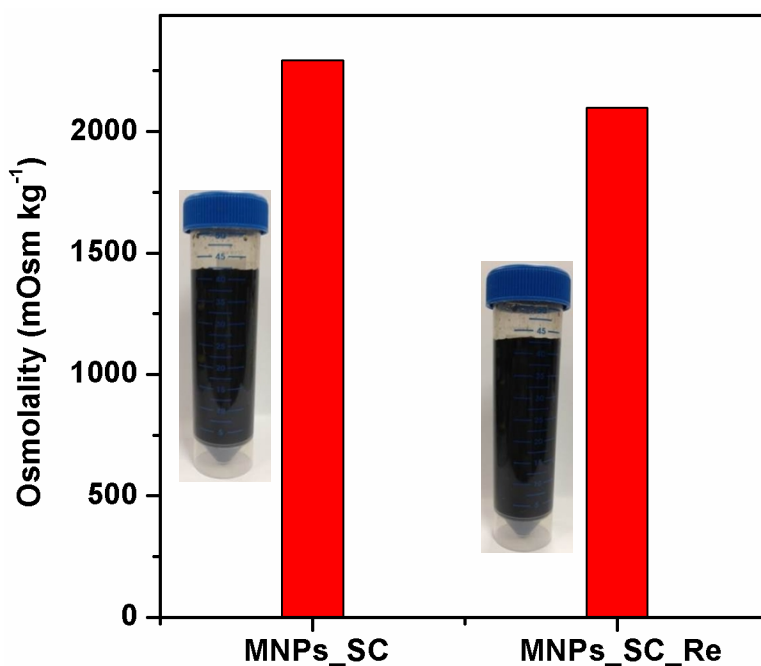

**Fig. S5** Osmolality and photos of the nanoparticle dispersions before protein enrichment (MNP<sub>s</sub>\_SC) and after regeneration *via* magnetic collection and ultrafiltration after the protein enrichment (MNP<sub>s</sub>\_SC\_Re).
